# Supplementary material for: A single probe to sense Al(iii) colorimetrically and Cd(ii) by turn-on fluorescence in physiological conditions and live cells, corroborated by X-ray crystallographic and theoretical studies
Source: Royal Society of Chemistry journal article supplement (doi:10.1039/c4dt01433b), 2015-01-01
Supplement: c4dt01433b1.pdf [file c4dt01433b1.pdf]

**Supporting Information**

**A single probe to sense Al(III) colorimetrically and  
Cd(II) by turn-on fluorescence in physiological  
conditions and live cells, corroborated by X-ray  
crystallographic and theoretical studies**

*Chirantan Kar<sup>a</sup>, Soham Samanta<sup>a</sup>, Sudeep Goswami<sup>b</sup>, Aiyagari Ramesh<sup>\*b</sup> and Gopal Das<sup>\*a</sup>*

<sup>a</sup> Department of Chemistry, Indian Institute of Technology Guwahati, Assam, 781 039, India.

<sup>b</sup> Department of Biotechnology, Indian Institute of Technology Guwahati, Assam, 781 039, India.

E-mail: gdas@iitg.ernet.in; aramesh@iitg.ernet.in

Fax: +91-361-258-2349; Tel: +91-361-258-2313

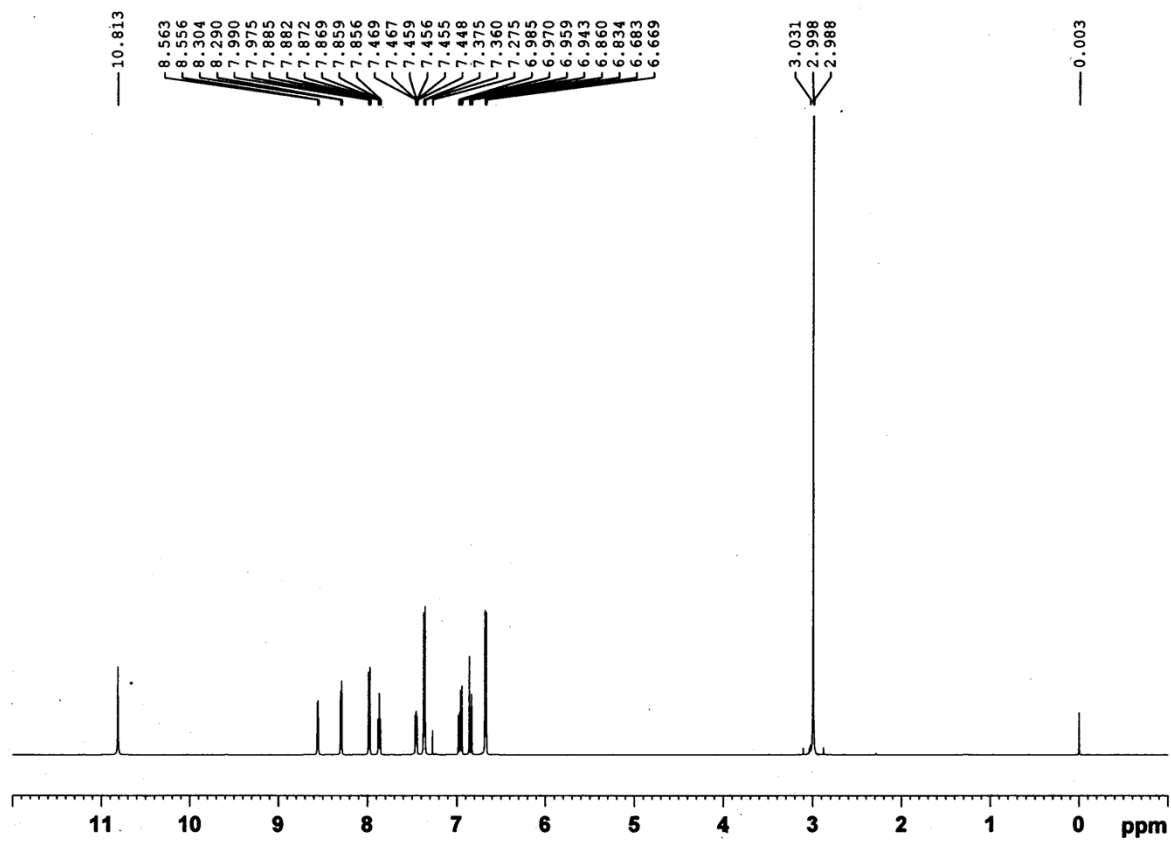

Figure S1:  $^1\text{H}$  NMR spectrum of  $\text{L}_1$  in  $\text{CDCl}_3$  solution.

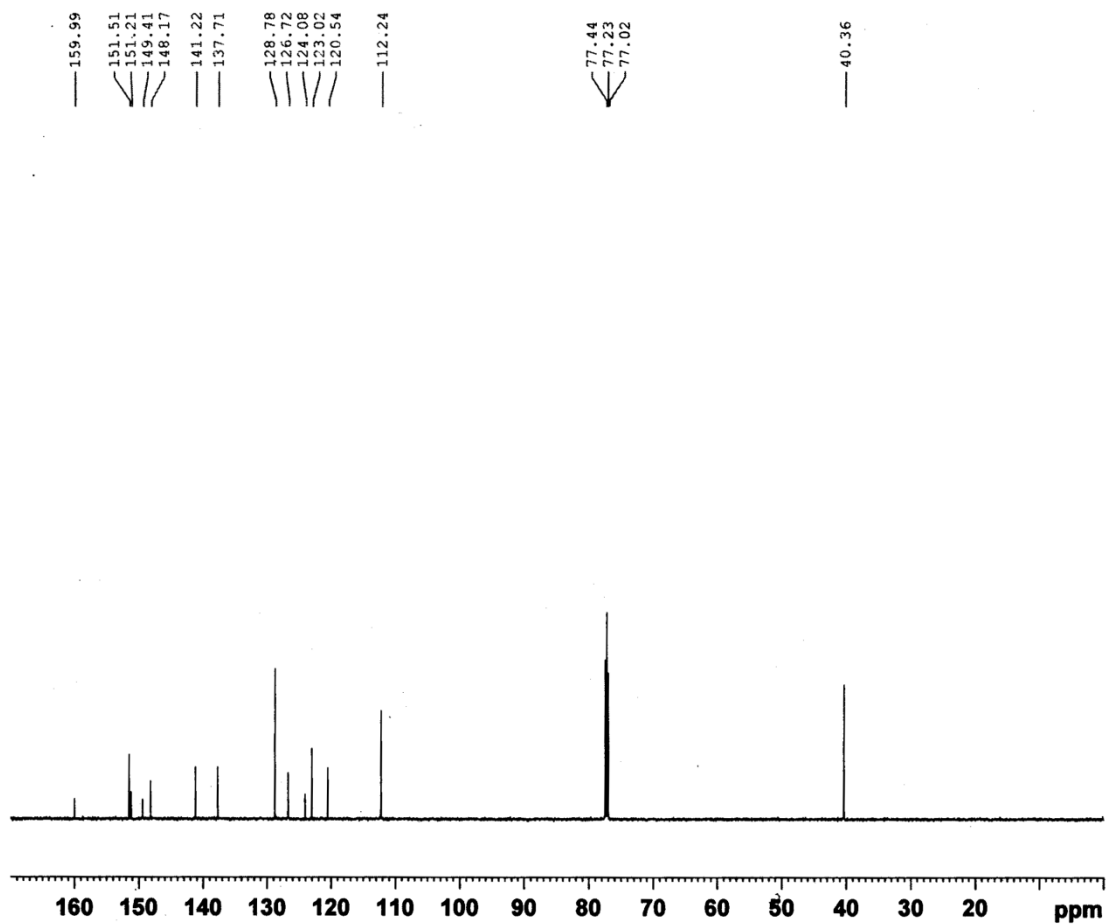

Figure S2:  $^{13}\text{C}$  NMR spectrum of  $\text{L}_1$  in  $\text{CDCl}_3$  solution.

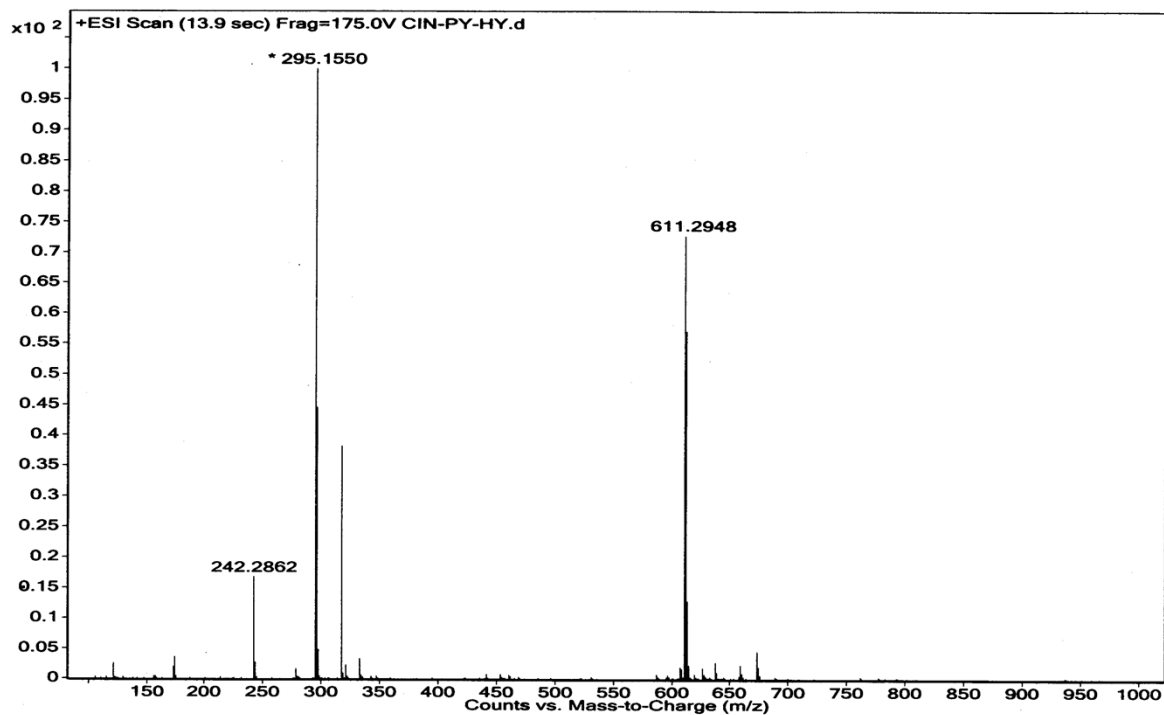

Figure S3: Mass spectrum of L<sub>1</sub> (Mass spectrum obtained in positive mode).

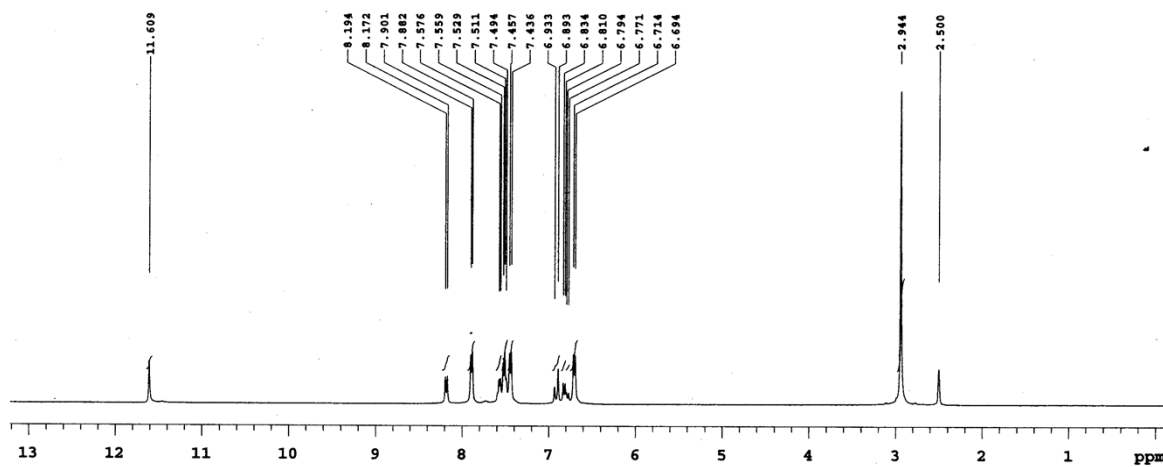

Figure S4: <sup>1</sup>H NMR spectrum of L<sub>2</sub> in CDCl<sub>3</sub> solution.

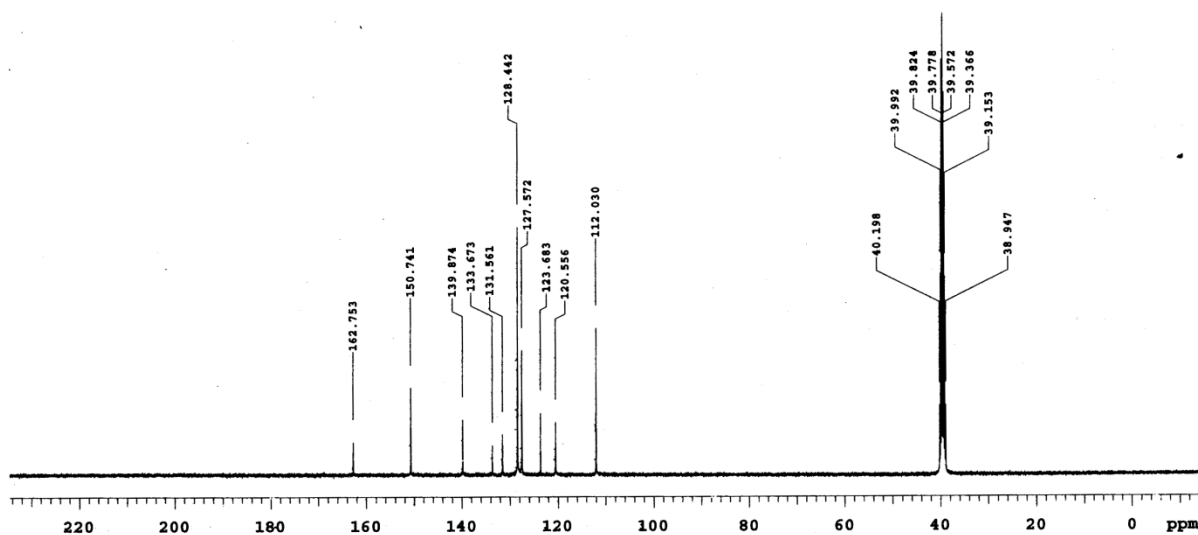

Figure S5:  $^{13}\text{C}$  NMR spectrum of  $\text{L}_2$  in  $\text{CDCl}_3$  solution.

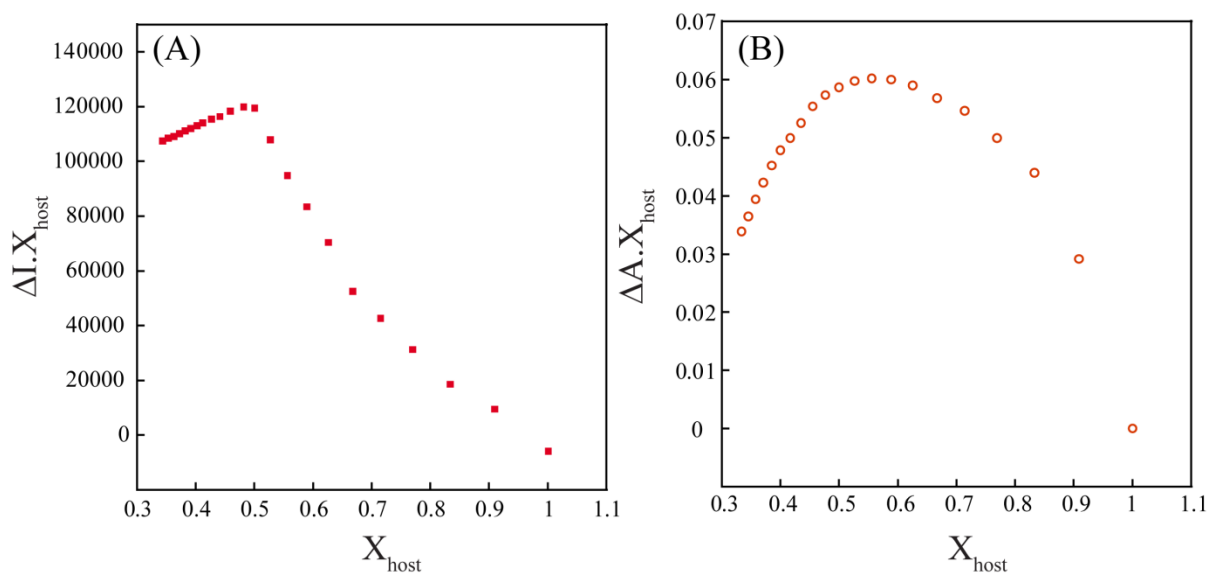

Figure S6: (A) Job's plot between  $\text{L}_1$  and  $\text{Cd}^{2+}$  ions. Where  $X_{\text{host}}$  = the mole fraction of  $\text{L}_1$  and  $\Delta I$  is the change ( $I-I_0$ ) in the intensity of the emission spectra in presence of guest. (B) Job's plot between  $\text{L}_1$  and  $\text{Al}^{3+}$  ions. Where  $X_{\text{host}}$  = the mole fraction of  $\text{L}_1$  and  $\Delta A$  is the change ( $A-A_0$ ) in the absorbance at 510 nm of the UV-Vis spectra in presence of guest.

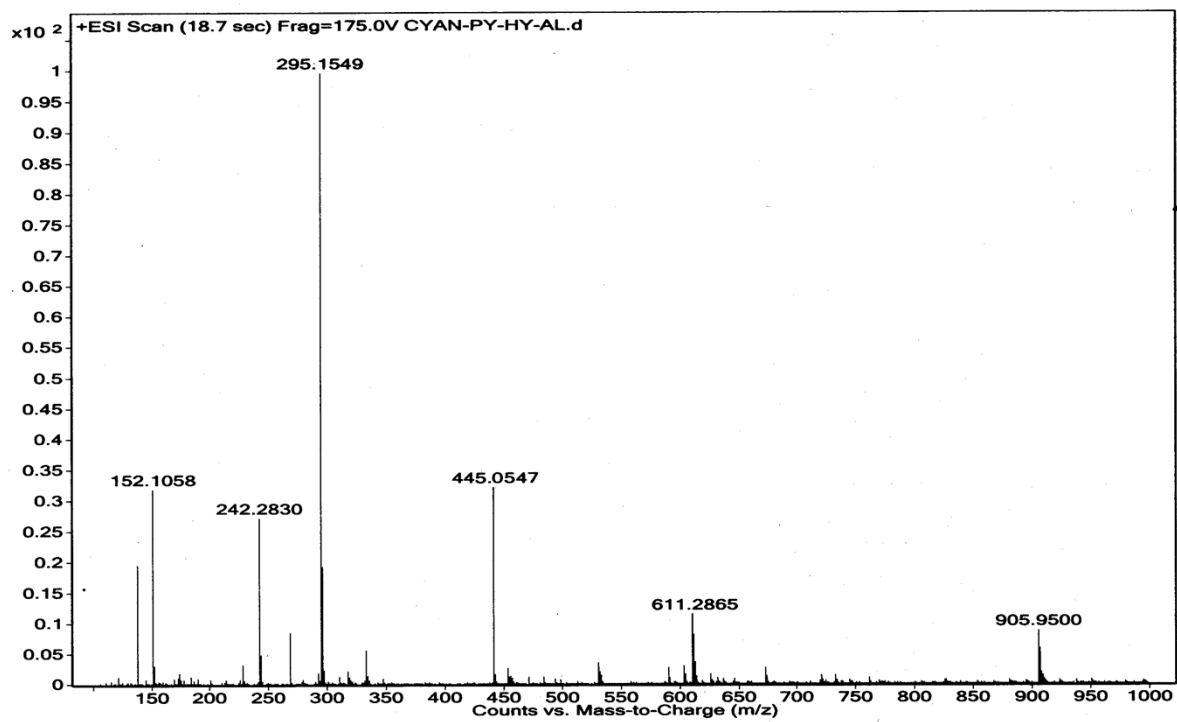

Figure S7: Mass spectrum of L<sub>1</sub>-Al complex.

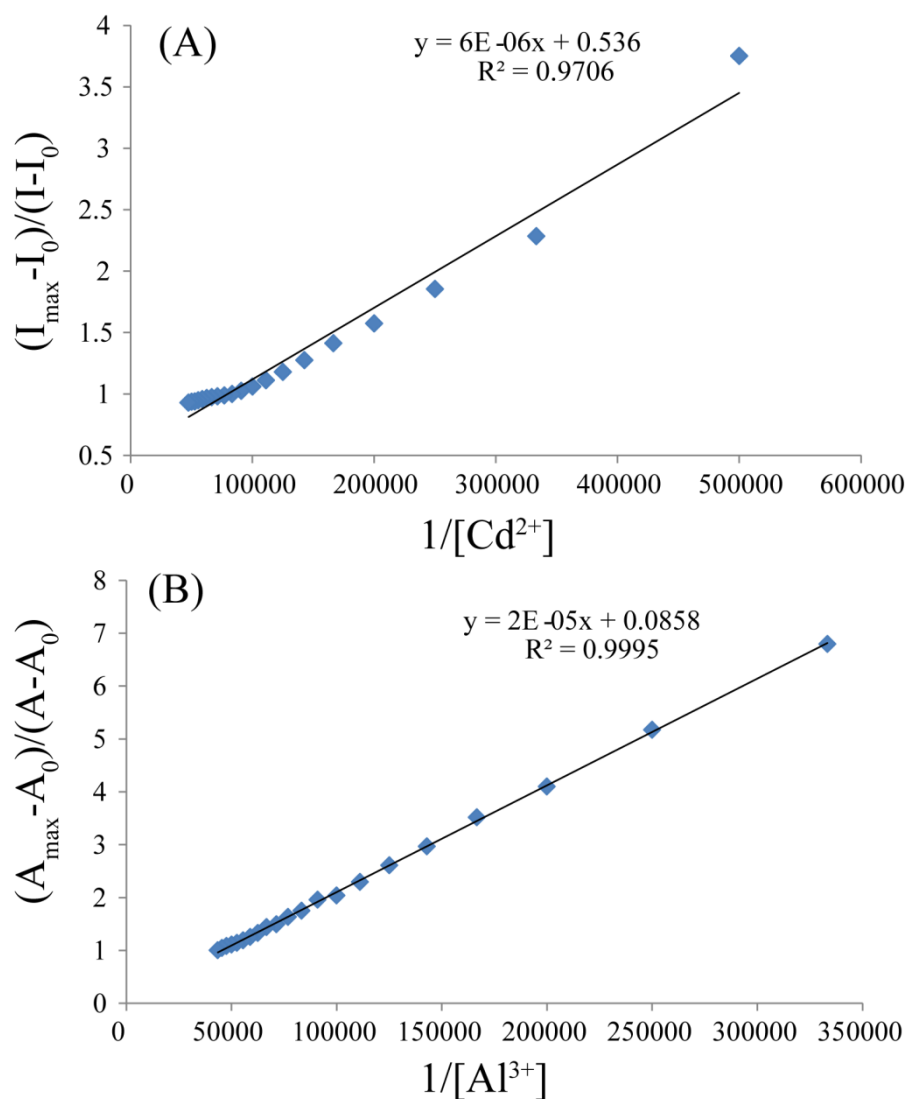

**Figure S8:** (A) Bensei-Hildebrand plot for  $L_1$ -Cd complex obtained from the fluorescence emission (calculated at  $\lambda_{em}$ ) studies. (B) Bensei-Hildebrand plot for  $L_1$ -Al complex obtained from the UV-Vis studies (calculated at  $\lambda = 510\text{nm}$ ) studies.

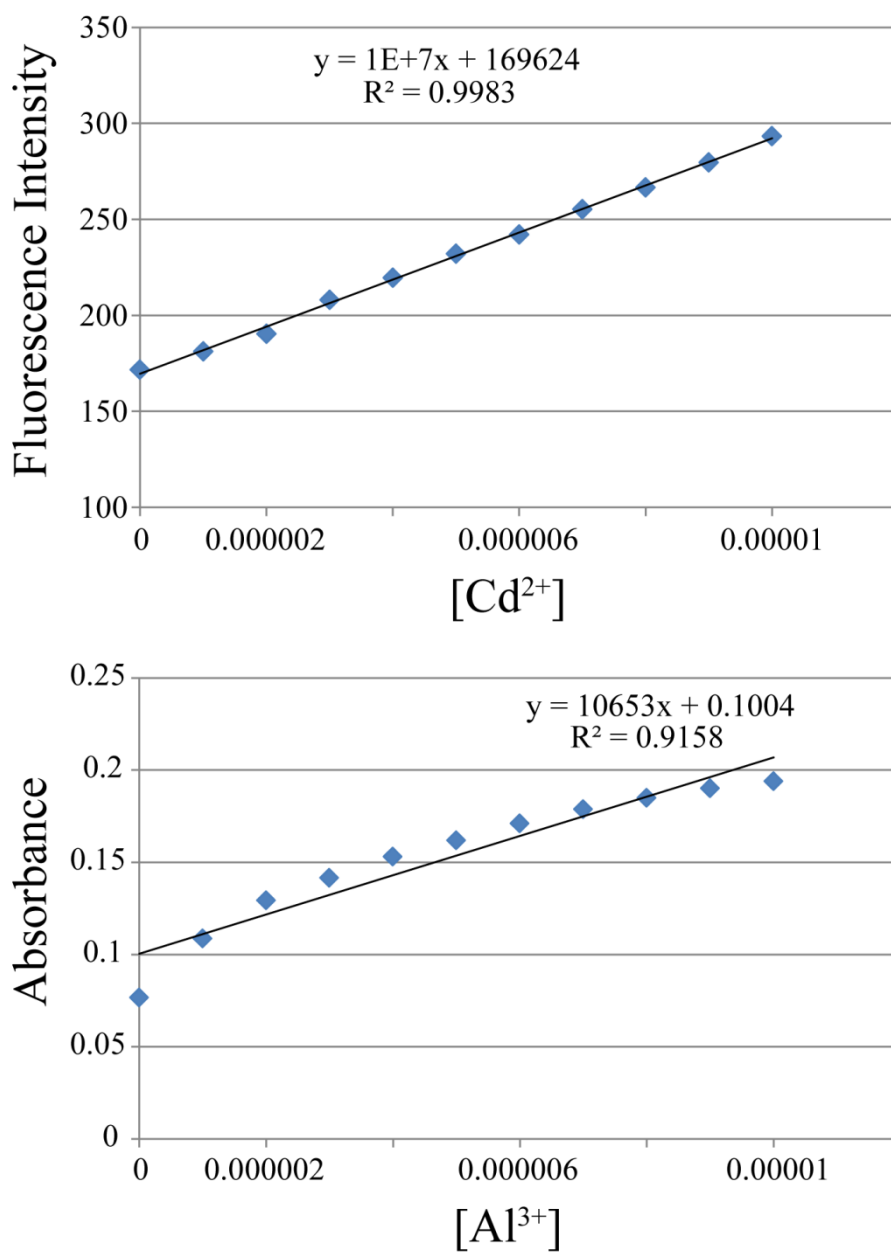

**Figure S9:** (A) Intensity versus Concentration plot for measuring the detection limit ( $3\sigma/k$ , here  $\sigma=11.657$ ) of  $Cd^{2+}$  by  $L^1$ . (B) Intensity versus Concentration plot for measuring the detection limit ( $3\sigma/k$ , here  $\sigma=0.030888$ ) of  $Al^{3+}$  by  $L^1$ .



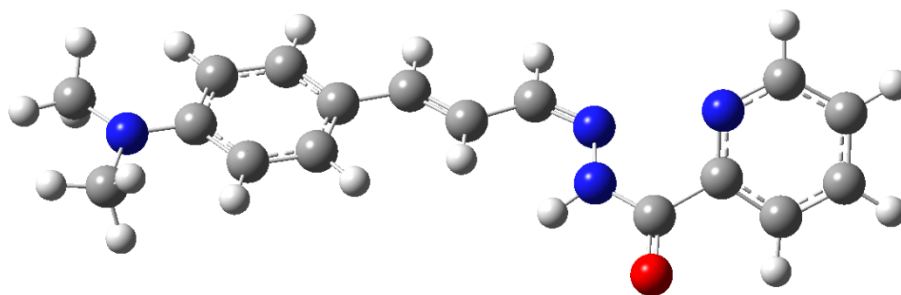

**Figure S10:** Optimized structure of  $L_1$  at B3LYP/6-31+ G(d,p).

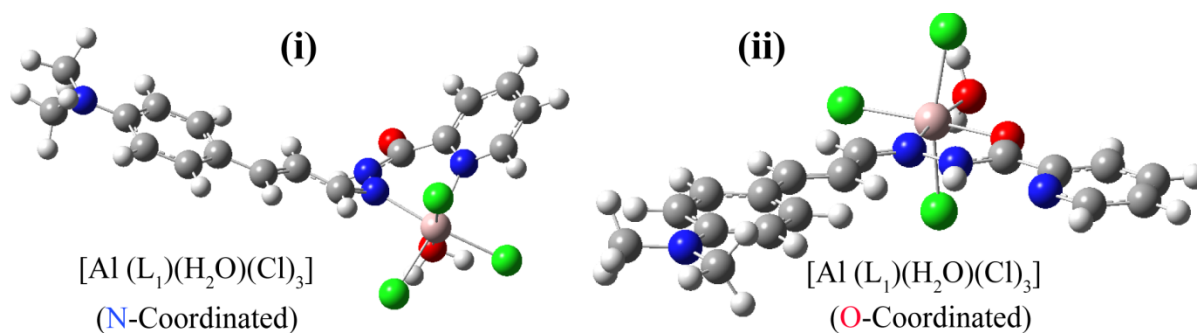

**Figure S11.** Optimized proposed structures of  $L_1-Al^{3+}$  complex at B3LYP/6-31+ G(d,p) (i) coordination through pyridine-N (b) coordination through carbonyl-O.

**Table S1.** Calculated total energies of  $L_1$  and  $L_1-Al^{3+}$  complex at B3LYP/6-31+ G(d,p)

| Molecule                                               | Total Energy (a.u.) |
|--------------------------------------------------------|---------------------|
| $L_1$                                                  | -952.85647086       |
| $L_1-Al^{3+}$ Complex (N-Coordinated) [Structure (i)]  | -2652.59357349      |
| $L_1-Al^{3+}$ Complex (O-Coordinated) [Structure (ii)] | -2652.60637327      |

Structure (ii) is more stable by 8.01 kcal/mole than the structure (i)

Coordinates for optimized geometry of  $L_1$  at B3LYP/6-31+ G(d,p).

-----

| Center | Atomic | Atomic | Coordinates (Angstroms) |   |   |
|--------|--------|--------|-------------------------|---|---|
| Number | Number | Type   | X                       | Y | Z |

---

|    |   |   |           |           |           |
|----|---|---|-----------|-----------|-----------|
| 1  | 6 | 0 | 3.723277  | -1.657780 | -0.420719 |
| 2  | 6 | 0 | 2.634455  | -0.788824 | -0.217420 |
| 3  | 6 | 0 | 2.946128  | 0.534725  | 0.155113  |
| 4  | 6 | 0 | 4.252358  | 0.961667  | 0.318962  |
| 5  | 6 | 0 | 5.344118  | 0.077511  | 0.122704  |
| 6  | 6 | 0 | 5.038689  | -1.249353 | -0.262741 |
| 7  | 1 | 0 | 3.527721  | -2.686120 | -0.715114 |
| 8  | 1 | 0 | 2.147965  | 1.252222  | 0.320253  |
| 9  | 1 | 0 | 4.429590  | 1.991895  | 0.601117  |
| 10 | 1 | 0 | 5.831694  | -1.964763 | -0.439962 |
| 11 | 6 | 0 | 1.279979  | -1.283328 | -0.400327 |
| 12 | 6 | 0 | 0.112177  | -0.609468 | -0.259545 |
| 13 | 1 | 0 | 1.212517  | -2.333740 | -0.686904 |
| 14 | 1 | 0 | 0.129867  | 0.435694  | 0.038527  |
| 15 | 6 | 0 | -1.166637 | -1.261673 | -0.450616 |
| 16 | 1 | 0 | -1.145483 | -2.337525 | -0.623211 |
| 17 | 6 | 0 | -4.951184 | 0.467229  | 0.031990  |
| 18 | 6 | 0 | -6.132266 | 0.890060  | -0.589185 |
| 19 | 6 | 0 | -7.315742 | 0.222221  | -0.288393 |
| 20 | 1 | 0 | -6.100715 | 1.725077  | -1.279338 |
| 21 | 6 | 0 | -6.052613 | -1.141963 | 1.224620  |
| 22 | 6 | 0 | -7.278183 | -0.818878 | 0.638056  |
| 23 | 1 | 0 | -8.249246 | 0.512389  | -0.761517 |
| 24 | 1 | 0 | -5.991562 | -1.935430 | 1.967308  |
| 25 | 1 | 0 | -8.175799 | -1.365736 | 0.909196  |
| 26 | 7 | 0 | 6.647714  | 0.494555  | 0.304648  |

|    |   |   |           |           |           |
|----|---|---|-----------|-----------|-----------|
| 27 | 7 | 0 | -4.904142 | -0.525092 | 0.931702  |
| 28 | 6 | 0 | -3.696815 | 1.244029  | -0.268550 |
| 29 | 8 | 0 | -3.735339 | 2.454310  | -0.469549 |
| 30 | 7 | 0 | -2.486917 | 0.587926  | -0.284731 |
| 31 | 1 | 0 | -1.704094 | 1.212181  | -0.465158 |
| 32 | 7 | 0 | -2.360898 | -0.764307 | -0.440212 |
| 33 | 6 | 0 | 6.931766  | 1.889364  | 0.598148  |
| 34 | 1 | 0 | 8.006038  | 2.014215  | 0.737087  |
| 35 | 1 | 0 | 6.611828  | 2.563436  | -0.209781 |
| 36 | 1 | 0 | 6.437781  | 2.211094  | 1.522882  |
| 37 | 6 | 0 | 7.746312  | -0.402532 | -0.011004 |
| 38 | 1 | 0 | 8.690432  | 0.092268  | 0.218714  |
| 39 | 1 | 0 | 7.697437  | -1.320154 | 0.588060  |
| 40 | 1 | 0 | 7.761540  | -0.691091 | -1.072167 |

-----  
Rotational constants (GHZ): 1.0804546 0.0699011 0.0670133

Coordinates for optimized geometry of  $L_1-Al^{3+}$  complex at B3LYP/6-31+ G(d,p),

Structure i

-----

| Center | Atomic | Atomic | Coordinates (Angstroms) |           |           |
|--------|--------|--------|-------------------------|-----------|-----------|
| Number | Number | Type   | X                       | Y         | Z         |
| 1      | 6      | 0      | -4.780313               | -1.413635 | 0.620151  |
| 2      | 6      | 0      | -3.811086               | -0.483185 | 0.186705  |
| 3      | 6      | 0      | -4.287227               | 0.765794  | -0.272506 |
| 4      | 6      | 0      | -5.633946               | 1.066849  | -0.297560 |
| 5      | 6      | 0      | -6.605432               | 0.124319  | 0.139820  |

|    |   |   |           |           |           |
|----|---|---|-----------|-----------|-----------|
| 6  | 6 | 0 | -6.133196 | -1.131358 | 0.601734  |
| 7  | 1 | 0 | -4.452267 | -2.385332 | 0.980087  |
| 8  | 1 | 0 | -3.584695 | 1.518903  | -0.615809 |
| 9  | 1 | 0 | -5.943649 | 2.039659  | -0.657312 |
| 10 | 1 | 0 | -6.829234 | -1.885159 | 0.946092  |
| 11 | 6 | 0 | -2.417495 | -0.844641 | 0.233085  |
| 12 | 6 | 0 | -1.335025 | -0.103639 | -0.147051 |
| 13 | 1 | 0 | -2.213444 | -1.843211 | 0.619467  |
| 14 | 1 | 0 | -1.454930 | 0.902126  | -0.536480 |
| 15 | 6 | 0 | -0.022437 | -0.641236 | 0.007953  |
| 16 | 1 | 0 | 0.092025  | -1.603802 | 0.497466  |
| 17 | 6 | 0 | 3.075936  | 2.027147  | -0.084008 |
| 18 | 6 | 0 | 3.584921  | 3.278196  | 0.269193  |
| 19 | 6 | 0 | 4.539321  | 3.361929  | 1.277392  |
| 20 | 1 | 0 | 3.215266  | 4.148928  | -0.257406 |
| 21 | 6 | 0 | 4.432866  | 0.974700  | 1.468391  |
| 22 | 6 | 0 | 4.959223  | 2.188403  | 1.897696  |
| 23 | 1 | 0 | 4.943189  | 4.324771  | 1.574493  |
| 24 | 1 | 0 | 4.748500  | 0.034382  | 1.901261  |
| 25 | 1 | 0 | 5.692490  | 2.197897  | 2.696085  |
| 26 | 7 | 0 | -7.944901 | 0.419838  | 0.115405  |
| 27 | 6 | 0 | 2.002475  | 2.028954  | -1.142625 |
| 28 | 8 | 0 | 1.919186  | 2.947945  | -1.947837 |
| 29 | 7 | 0 | 1.037019  | 1.059076  | -1.107265 |
| 30 | 1 | 0 | 0.370756  | 1.103046  | -1.871617 |
| 31 | 7 | 0 | 1.111918  | -0.123477 | -0.378735 |
| 32 | 6 | 0 | -8.403513 | 1.716907  | -0.361368 |

|    |    |   |           |           |           |
|----|----|---|-----------|-----------|-----------|
| 33 | 1  | 0 | -9.491536 | 1.751402  | -0.312629 |
| 34 | 1  | 0 | -8.011113 | 2.538624  | 0.251411  |
| 35 | 1  | 0 | -8.106566 | 1.894397  | -1.402665 |
| 36 | 6  | 0 | -8.918904 | -0.558481 | 0.578276  |
| 37 | 1  | 0 | -9.920227 | -0.139376 | 0.483087  |
| 38 | 1  | 0 | -8.880430 | -1.481153 | -0.014561 |
| 39 | 1  | 0 | -8.760586 | -0.821954 | 1.631801  |
| 40 | 7  | 0 | 3.511756  | 0.885250  | 0.490104  |
| 41 | 17 | 0 | 5.160098  | -1.675435 | -0.192112 |
| 42 | 17 | 0 | 2.448881  | -1.691459 | 1.974907  |
| 43 | 17 | 0 | 2.113370  | -2.896918 | -1.284841 |
| 44 | 8  | 0 | 3.361292  | -0.368296 | -2.053841 |
| 45 | 1  | 0 | 2.961807  | -1.111043 | -2.549127 |
| 46 | 1  | 0 | 4.319617  | -0.563987 | -2.046965 |
| 47 | 13 | 0 | 2.945671  | -1.122958 | -0.112054 |

-----  
Rotational constants (GHZ): 0.2758046 0.0556066 0.0510078

Structure ii

-----  
Center Atomic Atomic Coordinates (Angstroms)  
Number Number Type X Y Z

|   |   |   |           |           |           |
|---|---|---|-----------|-----------|-----------|
| 1 | 6 | 0 | -4.771213 | -1.653961 | -0.000178 |
| 2 | 6 | 0 | -3.712671 | -0.720827 | -0.000160 |
| 3 | 6 | 0 | -4.069594 | 0.645907  | -0.000074 |
| 4 | 6 | 0 | -5.388653 | 1.054419  | -0.000014 |
| 5 | 6 | 0 | -6.450324 | 0.108787  | -0.000040 |
| 6 | 6 | 0 | -6.098164 | -1.265002 | -0.000114 |

|    |   |   |           |           |           |
|----|---|---|-----------|-----------|-----------|
| 7  | 1 | 0 | -4.536393 | -2.715177 | -0.000236 |
| 8  | 1 | 0 | -3.295922 | 1.407670  | -0.000054 |
| 9  | 1 | 0 | -5.605330 | 2.115010  | 0.000056  |
| 10 | 1 | 0 | -6.866512 | -2.027389 | -0.000116 |
| 11 | 6 | 0 | -2.352049 | -1.200100 | -0.000217 |
| 12 | 6 | 0 | -1.195757 | -0.477300 | -0.000153 |
| 13 | 1 | 0 | -2.246245 | -2.284794 | -0.000315 |
| 14 | 1 | 0 | -1.233826 | 0.608426  | -0.000034 |
| 15 | 6 | 0 | 0.062593  | -1.155452 | -0.000201 |
| 16 | 1 | 0 | 0.076181  | -2.242855 | -0.000287 |
| 17 | 6 | 0 | 2.934039  | 2.602926  | 0.000153  |
| 18 | 6 | 0 | 4.227788  | 3.125094  | 0.000335  |
| 19 | 6 | 0 | 4.368224  | 4.511613  | 0.000361  |
| 20 | 1 | 0 | 5.076190  | 2.451227  | 0.000448  |
| 21 | 6 | 0 | 1.971226  | 4.679328  | 0.000026  |
| 22 | 6 | 0 | 3.221970  | 5.304401  | 0.000204  |
| 23 | 1 | 0 | 5.354857  | 4.963922  | 0.000501  |
| 24 | 1 | 0 | 1.057957  | 5.269572  | -0.000101 |
| 25 | 1 | 0 | 3.287531  | 6.387301  | 0.000217  |
| 26 | 7 | 0 | -7.763048 | 0.511356  | 0.000000  |
| 27 | 7 | 0 | 1.819460  | 3.353689  | 0.000000  |
| 28 | 6 | 0 | 2.727983  | 1.132328  | 0.000111  |
| 29 | 8 | 0 | 3.671672  | 0.318194  | 0.000216  |
| 30 | 7 | 0 | 1.450417  | 0.707413  | -0.000048 |
| 31 | 1 | 0 | 0.701578  | 1.390773  | -0.000200 |
| 32 | 6 | 0 | -8.098089 | 1.927682  | 0.000234  |
| 33 | 1 | 0 | -9.182163 | 2.038567  | 0.000195  |

|    |    |   |           |           |           |
|----|----|---|-----------|-----------|-----------|
| 34 | 1  | 0 | -7.706354 | 2.438743  | 0.889127  |
| 35 | 1  | 0 | -7.706276 | 2.439025  | -0.888458 |
| 36 | 6  | 0 | -8.830513 | -0.478041 | 0.000118  |
| 37 | 1  | 0 | -9.792856 | 0.033162  | 0.000063  |
| 38 | 1  | 0 | -8.788918 | -1.120940 | -0.888455 |
| 39 | 1  | 0 | -8.788916 | -1.120777 | 0.888815  |
| 40 | 7  | 0 | 1.261316  | -0.650480 | -0.000146 |
| 41 | 17 | 0 | 3.327584  | -1.492274 | 2.266072  |
| 42 | 17 | 0 | 3.328180  | -1.491854 | -2.266047 |
| 43 | 17 | 0 | 2.238202  | -3.712901 | -0.000340 |
| 44 | 8  | 0 | 5.025555  | -2.260014 | 0.000193  |
| 45 | 1  | 0 | 5.147516  | -2.806892 | -0.793398 |
| 46 | 1  | 0 | 5.147293  | -2.806882 | 0.793826  |
| 47 | 13 | 0 | 3.112891  | -1.641408 | -0.000040 |

-----  
 Rotational constants (GHZ): 0.1862056 0.0603920 0.0488042

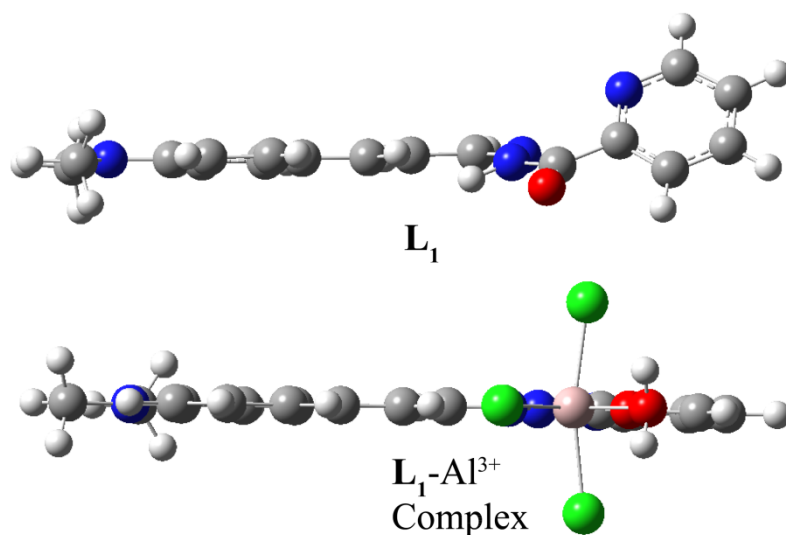

**Figure S12:** Comparison of the planarity between  $L_1$  and its Al-complex (structure **i**)

**Table S2.** Selected orbitals and their energies for  $L_1$  at B3LYP/6-31+ G(d,p).

| Occupied Orbitals                                                                            | Energy (eV) | Vacant Orbitals                                                                                | Energy (eV) |
|----------------------------------------------------------------------------------------------|-------------|------------------------------------------------------------------------------------------------|-------------|
| HOMO -2<br>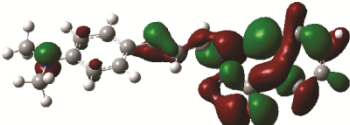 | -6.4341     | LUMO<br>     | -1.4798     |
| HOMO -1<br> | -6.0915     | LUMO+1<br>   | -0.8923     |
| HOMO<br>  | -5.0080     | LUMO+2<br> | -0.3510     |



**Table S3.** Selected orbitals and their energies for L<sub>1</sub>-Al complex (structure **ii**) at B3LYP/6-31+ G(d,p).

| Occupied Orbitals                                                                            | Energy (eV) | Vacant Orbitals                                                                                | Energy (eV) |
|----------------------------------------------------------------------------------------------|-------------|------------------------------------------------------------------------------------------------|-------------|
| HOMO -2<br> | -6.2757     | LUMO<br>     | -2.5527     |
| HOMO -1<br> | -5.8417     | LUMO+1<br>   | -1.9257     |
| HOMO<br>  | -5.6332     | LUMO+2<br> | -1.3108     |

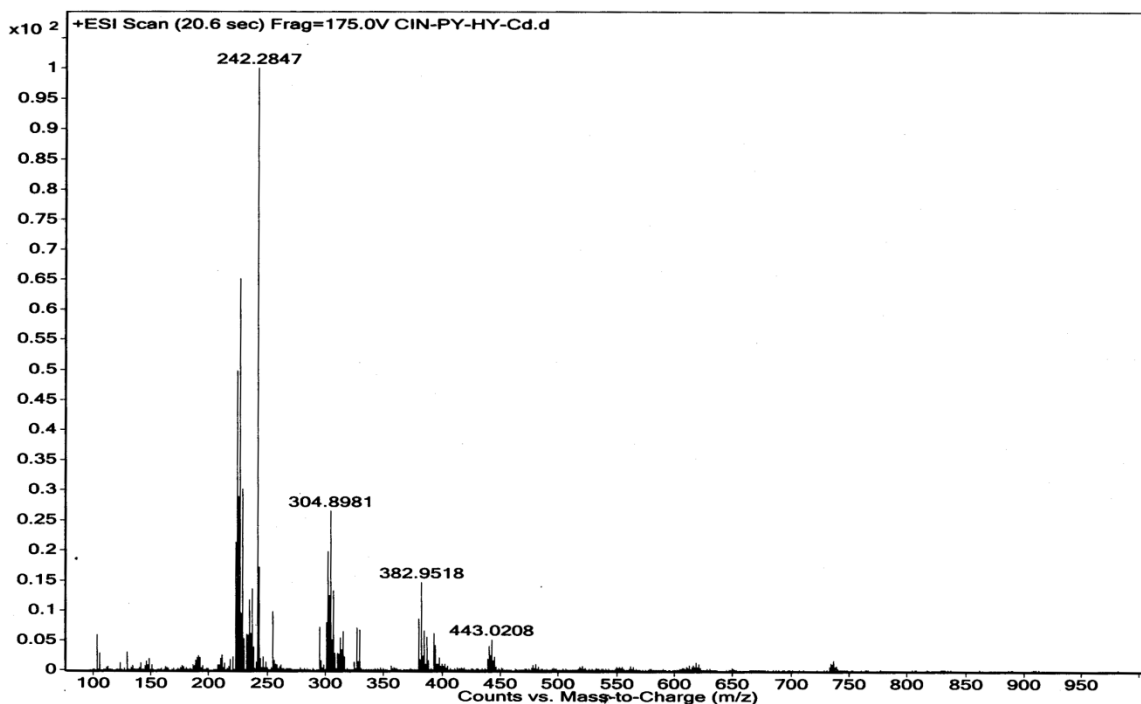

Figure S13: Mass spectrum of the solution containing  $L_1$  in presence of  $Cd^{2+}$  ions.

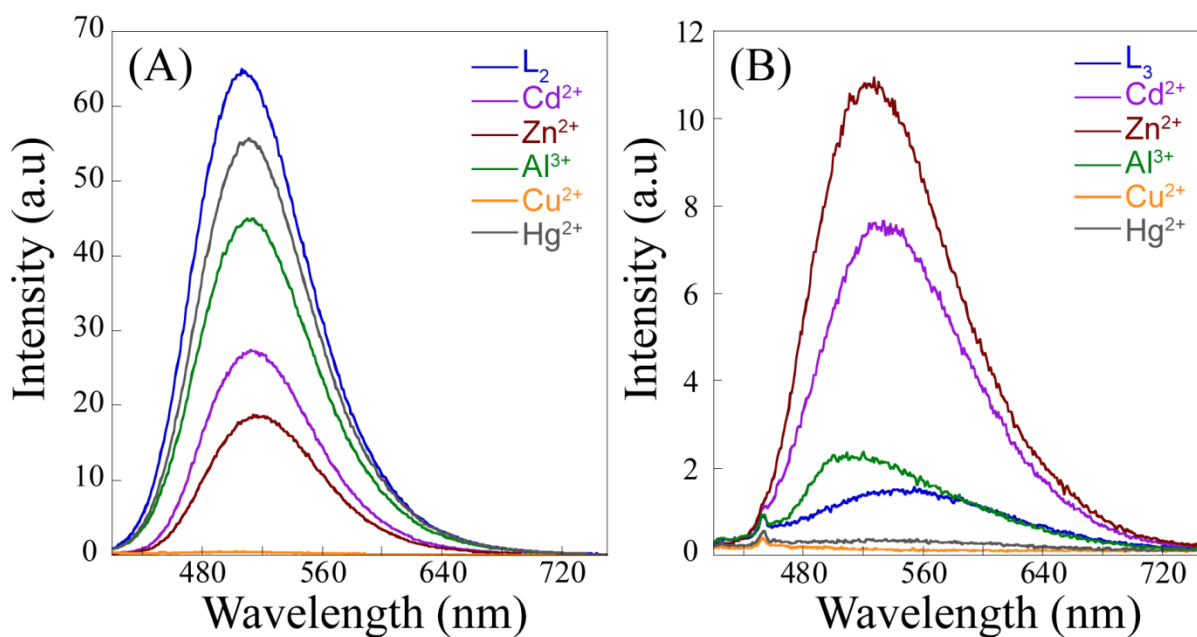

Figure S14: Fluorescence spectra of  $L_2$  and  $L_3$  in presence of various cations.

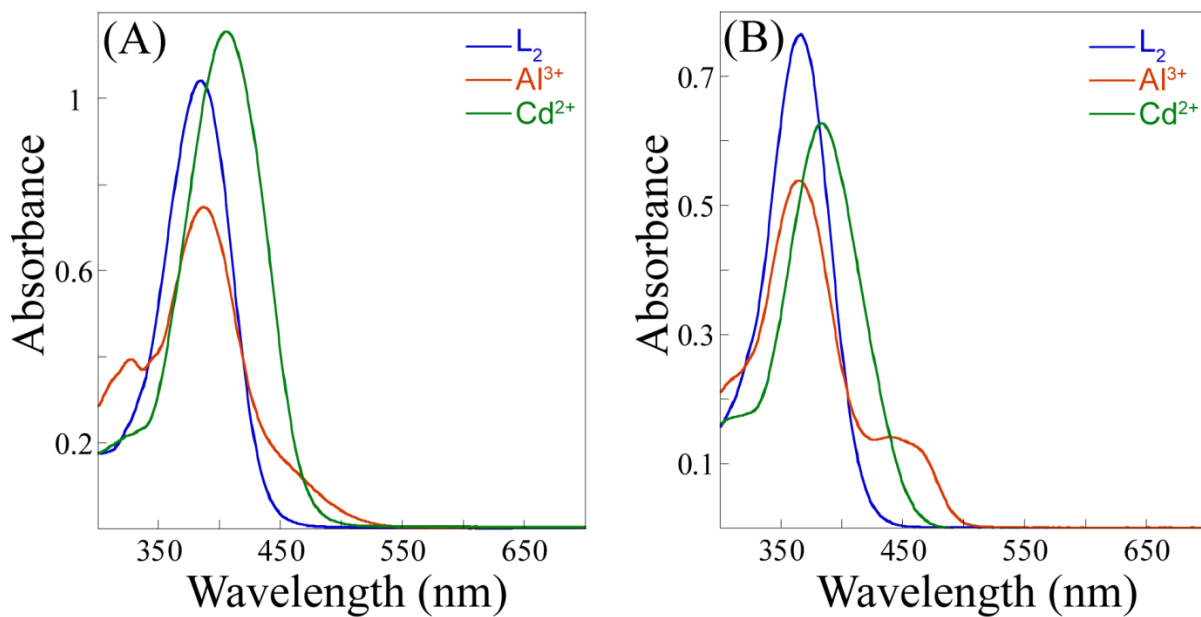

**Figure S15:** UV-Vis spectra of L<sub>2</sub> and L<sub>3</sub> in presence of Al<sup>3+</sup> and Cd<sup>2+</sup>.

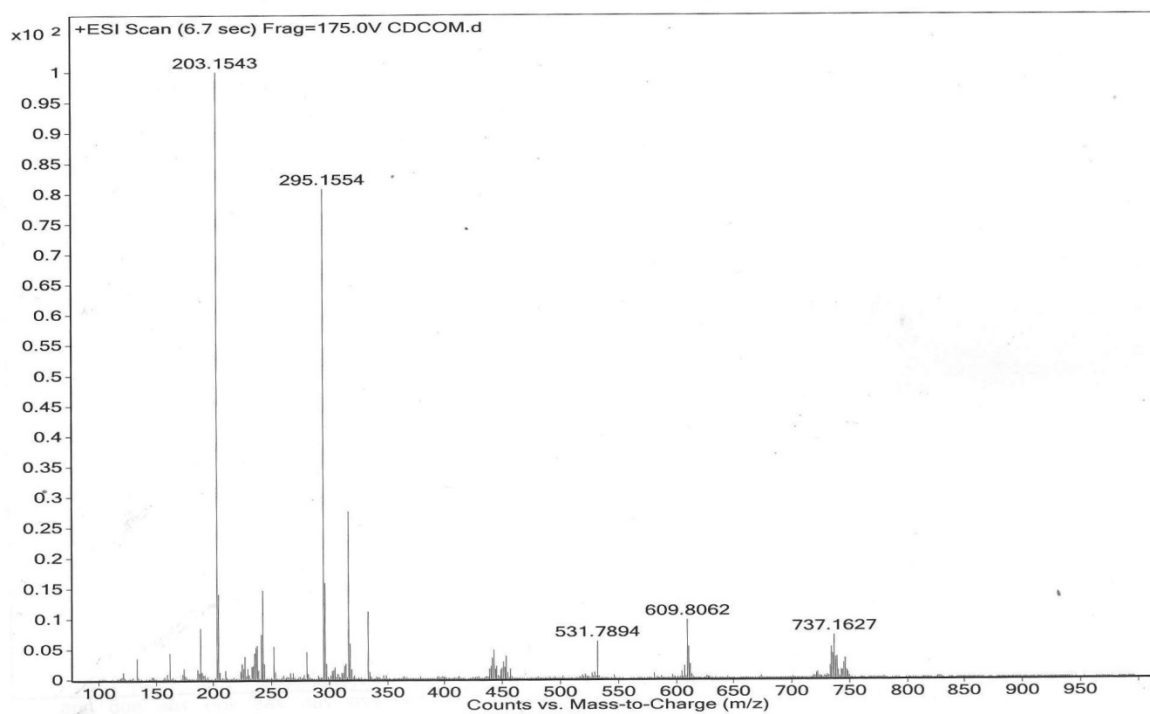

**Figure S16:** Mass spectrum of the L<sub>1</sub>-Cd crystal

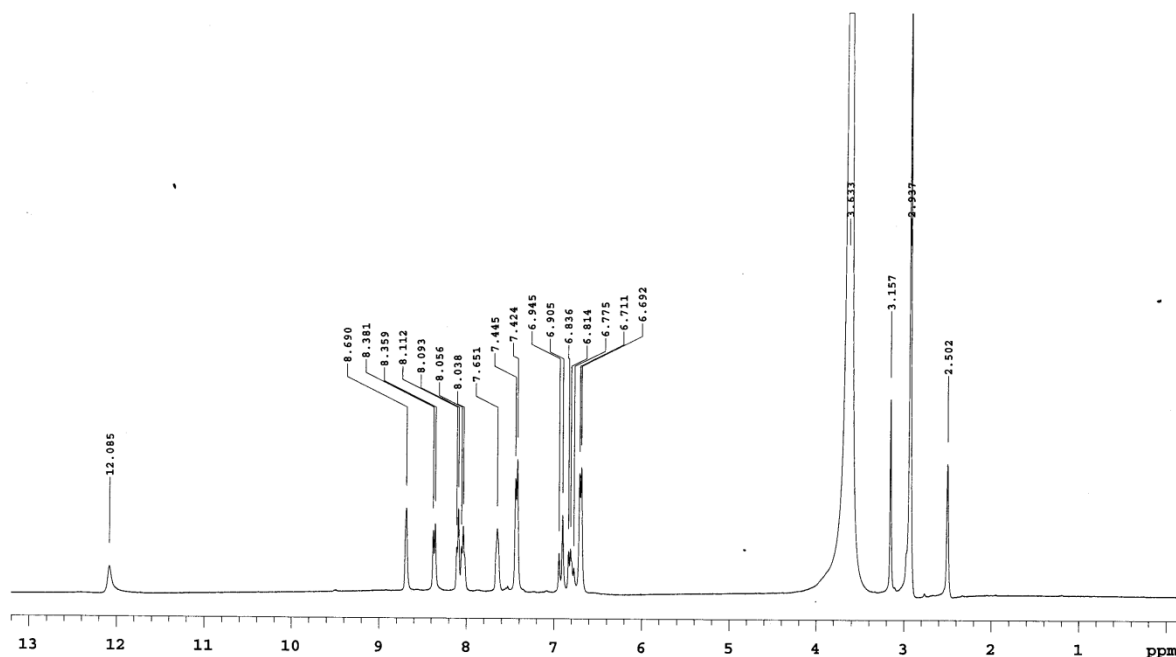

**Figure S17:**  $^1\text{H}$  NMR spectrum of the  $\text{L}_1\text{-Cd}$  crystals in  $\text{d}_6$  DMSO solution.

#### References:

1. Koch, W.; Holthausen, M. C. *A Chemist's Guide to Density Functional Theory*. 2nd edition, Wiley-VCH, New York, **2000**, 1-300.
2. Gaussian 03, Revision E.01, M. J. Frisch, G. W. Trucks, H. B. Schlegel, G. E. Scuseria, M. A. Robb, J. R. Cheeseman, J. A. Montgomery, Jr., T. Vreven, K. N. Kudin, J. C. Burant, J. M. Millam, S. S. Iyengar, J. Tomasi, V. Barone, B. Mennucci, M. Cossi, G. Scalmani, N. Rega, G. A. Petersson, H. Nakatsuji, M. Hada, M. Ehara, K. Toyota, R. Fukuda, J. Hasegawa, M. Ishida, T. Nakajima, Y. Honda, O. Kitao, H. Nakai, M. Klene, X. Li, J. E. Knox, H. P. Hratchian, J. B. Cross, V. Bakken, C. Adamo, J. Jaramillo, R. Gomperts, R. E. Stratmann, O. Yazyev, A. J. Austin, R. Cammi, C. Pomelli, J. W. Ochterski, P. Y. Ayala, K. Morokuma, G. A. Voth, P. Salvador, J. J. Dannenberg, V. G. Zakrzewski, S. Dapprich, A. D. Daniels, M. C. Strain, O. Farkas, D. K. Malick, A. D. Rabuck, K. Raghavachari, J. B. Foresman, J. V. Ortiz, Q. Cui, A. G. Baboul, S. Clifford, J. Cioslowski, B. B. Stefanov, G. Liu, A. Liashenko, P. Piskorz, I. Komaromi, R. L. Martin, D. J. Fox, T. Keith, M. A. Al-Laham, C. Y. Peng, A. Nanayakkara, M. Challacombe, P. M. W. Gill, B. Johnson, W. Chen, M. W. Wong, C. Gonzalez, and J. A. Pople, Gaussian, Inc., Wallingford CT, 2004.
